# Supplementary figures and images for: Tramtrack regulates different morphogenetic events duringDrosophilatracheal development
Source: Oxford University Press journal article supplement (doi:10.1242/dev.007328), 2007-09-20

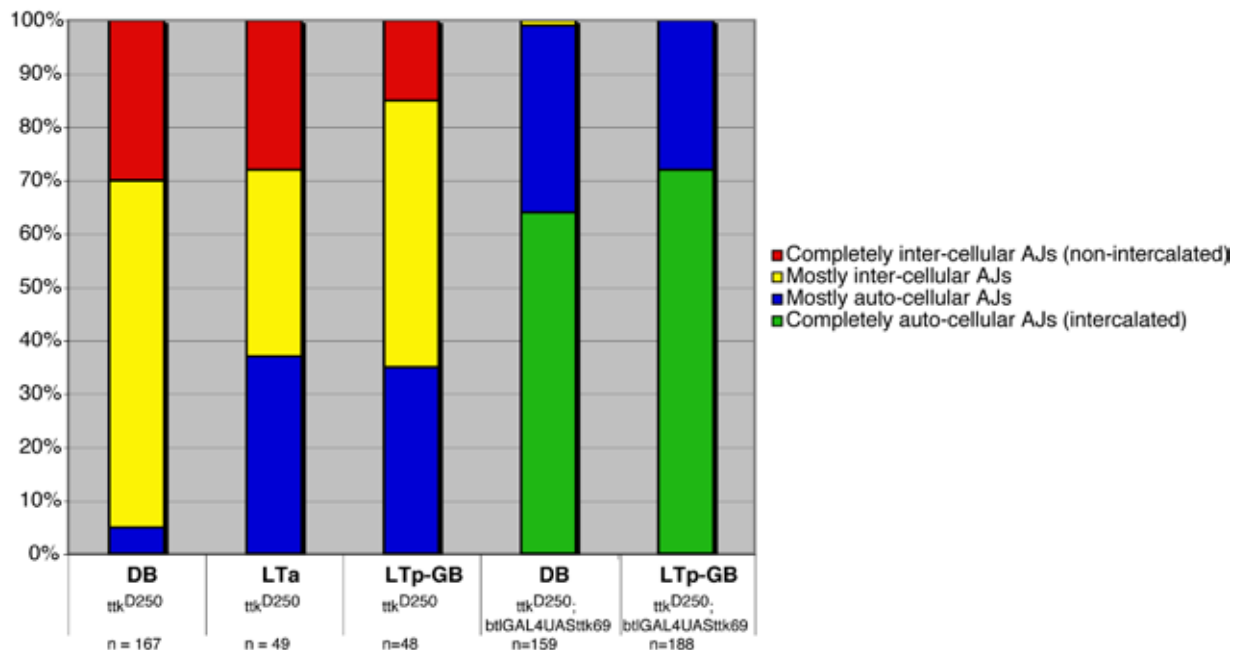

Supplement: dev007328-sup-007328-figs1.pdf [file dev007328-sup-007328-figs1.pdf]
